# Supplementary material for: The Impact of Life Trauma on Mental Health and Suicidal Behavior: A Study from Portuguese Language Countries
Source: MDPI journal article supplement (doi:10.3390/bs12040102), 2022-04-10
Supplement: s1 [file s1]

Table S1. Incidence of traumatic experiences.

| Experience               | Trauma intensity | n   | %    |
|--------------------------|------------------|-----|------|
| War                      | 0                | 890 | 89.4 |
|                          | 1                | 51  | 5.1  |
|                          | 2                | 36  | 3.6  |
|                          | 3                | 19  | 1.9  |
| Accident                 | 0                | 731 | 72.7 |
|                          | 1                | 150 | 14.9 |
|                          | 2                | 75  | 7.4  |
|                          | 3                | 50  | 5    |
| Disaster                 | 0                | 872 | 86.7 |
|                          | 1                | 77  | 7.6  |
|                          | 2                | 38  | 3.8  |
|                          | 3                | 19  | 1.9  |
| Illness                  | 0                | 838 | 83.3 |
|                          | 1                | 60  | 5.9  |
|                          | 2                | 58  | 5.8  |
|                          | 3                | 50  | 5    |
| Physical abuse           | 0                | 767 | 76.2 |
|                          | 1                | 135 | 13.4 |
|                          | 2                | 58  | 5.8  |
|                          | 3                | 46  | 4.6  |
| Psychological abuse      | 0                | 615 | 61.1 |
|                          | 1                | 208 | 20.7 |
|                          | 2                | 93  | 9.2  |
|                          | 3                | 90  | 9    |
| Sexual abuse             | 0                | 852 | 84.7 |
|                          | 1                | 83  | 8.3  |
|                          | 2                | 32  | 3.2  |
|                          | 3                | 39  | 3.8  |
| Assault                  | 0                | 569 | 56.6 |
|                          | 1                | 268 | 26.6 |
|                          | 2                | 107 | 10.6 |
|                          | 3                | 62  | 6.2  |
| Death of a family member | 0                | 694 | 69   |
|                          | 1                | 118 | 11.7 |
|                          | 2                | 76  | 7.6  |
|                          | 3                | 118 | 11.7 |
| Witness of death         | 0                | 681 | 67.7 |
|                          | 1                | 146 | 14.5 |
|                          | 2                | 82  | 8.2  |
|                          | 3                | 97  | 9.6  |

Table S2. Results for mental health symptoms.

| Symptom    | Frequency  | n   | %    | Mean | S.D.  |
|------------|------------|-----|------|------|-------|
| Anxiety    | Never      | 572 | 56.9 | 0.96 | 0.779 |
|            | Few times  | 318 | 31.6 |      |       |
|            | Sometimes  | 100 | 9.9  |      |       |
|            | Often      | 13  | 1.3  |      |       |
|            | Many times | 3   | 0.3  |      |       |
| Depression | Never      | 590 | 58.7 | 0.91 | 0.781 |
|            | Few times  | 303 | 30.1 |      |       |
|            | Sometimes  | 90  | 8.9  |      |       |

|              |            |     |      |      |       |
|--------------|------------|-----|------|------|-------|
|              | Often      | 19  | 1.9  |      |       |
|              | Many times | 4   | 0.4  |      |       |
| Somatization | Never      | 774 | 76.9 | 0.56 | 0.622 |
|              | Few times  | 194 | 19.3 |      |       |
|              | Sometimes  | 32  | 3.2  |      |       |
|              | Often      | 6   | 0.6  |      |       |
|              | Many times | 0   | 0    |      |       |

Table S3. Incidence of suicidal behavior.

| Variable     | Frequency                                                              | n   | %    |
|--------------|------------------------------------------------------------------------|-----|------|
| SBQ 1 -      | Never                                                                  | 604 | 60   |
| Lifetime     | Only a passing thought                                                 | 337 | 33.5 |
| suicidal     | I had a plan to commit suicide, at least once but I never accomplished | 65  | 6.5  |
| thoughts     | anything                                                               | 0   | 0    |
|              | I had a plan to commit suicide and I really wanted to die              |     |      |
| SBQ 2 -      | Never                                                                  | 905 | 89.9 |
| Lifetime     | Just a fleeting attempt                                                | 52  | 5.2  |
| suicidal     | I tried to commit suicide, but I didn't really want to die             | 24  | 2.4  |
| attempts     | I tried to commit suicide and I really wanted to die                   | 25  | 2.5  |
| SBQ 3 -      | Never                                                                  | 821 | 81.6 |
| Suicidal     | Rarely (once)                                                          | 103 | 10.2 |
| thoughts in  | Sometimes (twice)                                                      | 35  | 3.5  |
| the last     | Several times (three or four times)                                    | 29  | 2.9  |
| year         | Often (five or more times)                                             | 18  | 1.8  |
| SBQ 4 -      | Never                                                                  | 973 | 96.8 |
| Suicidal     | Rarely (once)                                                          | 17  | 1.7  |
| attempts in  | Sometimes (twice)                                                      | 10  | 1    |
| the last     | Several times (three or four times)                                    | 3   | 0.3  |
| year         | Often (five or more times)                                             | 2   | 0.2  |
| SBQ 5 -      | 1                                                                      | 813 | 80.8 |
| Probability  | 2                                                                      | 121 | 12   |
| of           | 3                                                                      | 32  | 3.2  |
| committing   | 4                                                                      | 17  | 1.7  |
| suicide      | 5                                                                      | 11  | 1.1  |
| (1 = not     | 6                                                                      | 6   | 0.6  |
| likely - 7 = | 7                                                                      | 6   | 0.6  |
| very likely) |                                                                        |     |      |

Table S4. Correlation values among mental health symptoms and traumatic experiences.

|         | 1       | 2       | 3       | 4       | 5       | 6       | 7       | 8       | 9       | 10      | 11      | 12     | 13 |
|---------|---------|---------|---------|---------|---------|---------|---------|---------|---------|---------|---------|--------|----|
| 1- ANX  | -       |         |         |         |         |         |         |         |         |         |         |        |    |
| 2- DEP  | 0.776** | -       |         |         |         |         |         |         |         |         |         |        |    |
| 3- SOM  | 0.682** | 0.592** | -       |         |         |         |         |         |         |         |         |        |    |
| 4- T1   | -0.040  | -0.001  | 0.010   | -       |         |         |         |         |         |         |         |        |    |
| 5- T2   | 0.022   | 0.036   | 0.078*  | 0.222** | -       |         |         |         |         |         |         |        |    |
| 6- T3   | 0.051   | 0.022   | 0.054   | 0.177** | 0.217** | -       |         |         |         |         |         |        |    |
| 7- T4   | 0.101** | 0.059   | 0.121** | 0.069*  | 0.155** | 0.134** | -       |         |         |         |         |        |    |
| 8- T5   | 0.228** | 0.228** | 0.195** | 0.061   | 0.181** | 0.175** | 0.092** | -       |         |         |         |        |    |
| 9- T6   | 0.331** | 0.309** | 0.233** | -0.013  | 0.117** | 0.160** | 0.098** | 0.658** | -       |         |         |        |    |
| 10- T7  | 0.229** | 0.189** | 0.209** | -0.017  | 0.091** | 0.091** | 0.068*  | 0.469** | 0.486** | -       |         |        |    |
| 11- T8  | 0.113** | 0.076*  | 0.098** | 0.069*  | 0.185** | 0.174** | 0.168** | 0.187** | 0.206** | 0.120** | -       |        |    |
| 12- T9  | 0.070*  | 0.067*  | 0.043   | 0.167** | 0.151** | 0.117** | 0.068*  | 0.175** | 0.121** | 0.104** | 0.181** | -      |    |
| 13- T10 | 0.102*  | 0.102*  | 0.116** | 0.234** | 0.216** | 0.180** | 0.173** | 0.151** | 0.088** | 0.090** | 0.252** | 0.315* | -  |

\*p&lt;0.05;

\*\*p&lt;0.01

Table S5. Correlation values among suicidal behavior and traumatic experiences.

|         | 1       | 2       | 3       | 4       | 5       | 6       | 7       | 8       | 9       | 10      | 11    | 12 | 13 | 14 | 15 |
|---------|---------|---------|---------|---------|---------|---------|---------|---------|---------|---------|-------|----|----|----|----|
| 1- SBQ1 | -       |         |         |         |         |         |         |         |         |         |       |    |    |    |    |
| 2- SBQ2 | 0.413** | -       |         |         |         |         |         |         |         |         |       |    |    |    |    |
| 3- SBQ3 | 0.526** | 0.342** | -       |         |         |         |         |         |         |         |       |    |    |    |    |
| 4- SBQ4 | 0.170** | 0.448** | 0.386** | -       |         |         |         |         |         |         |       |    |    |    |    |
| 5- SBQ5 | 0.403** | 0.401** | 0.566** | 0.456** | -       |         |         |         |         |         |       |    |    |    |    |
| 6- T1   | -0.042  | -0.048  | -0.013  | 0.012   | -0.006  | -       |         |         |         |         |       |    |    |    |    |
| 7- T2   | 0.012   | 0.034   | 0.007   | 0.071*  | 0.095** | 0.222** | -       |         |         |         |       |    |    |    |    |
| 8- T3   | 0.040   | 0.042   | 0.002   | 0.029   | 0.035   | 0.177** | 0.217** | -       |         |         |       |    |    |    |    |
| 9- T4   | 0.068*  | 0.104** | 0.046   | 0.134** | 0.095** | 0.069*  | 0.155** | 0.134** | -       |         |       |    |    |    |    |
| 10- T5  | 0.162** | 0.191** | 0.183** | 0.118** | 0.155** | 0.061   | 0.181** | 0.175** | 0.092** | -       |       |    |    |    |    |
| 11- T6  | 0.289** | 0.238** | 0.242** | 0.223** | -0.013  | 0.117** | 0.160** | 0.098** | 0.658** |         | -     |    |    |    |    |
| 12- T7  | 0.201** | 0.225** | 0.153** | 0.086** | 0.175** | -0.017  | 0.091** | 0.091** | 0.068*  | 0.469** | 0.486 | -  |    |    |    |

|         |         |       |        |        |         |         |         |         |         |         |         |         |         |         |   |
|---------|---------|-------|--------|--------|---------|---------|---------|---------|---------|---------|---------|---------|---------|---------|---|
| 13- T8  | 0.081*  | 0.059 | 0.073* | 0.030  | 0.115** | 0.069*  | 0.185** | 0.174** | 0.168** | 0.187** | 0.206** | 0.120** | -       |         |   |
| 14- T9  | -0.006  | 0.060 | 0.031  | 0.088* | 0.031   | 0.167** | 0.151** | 0.117** | 0.068*  | 0.175** | 0.121** | 0.104** | 0.181** | -       |   |
| 15- T10 | 0.099** | 0.046 | 0.069* | 0.067* | 0.072*  | 0.234** | 0.216** | 0.180** | 0.173** | 0.151** | 0.088** | 0.090** | 0.252** | 0.315** | - |

\*p<0.05

\*\*p<0.
